# Supplementary material
Source: ML conference proceedings conference paper supplement (https://openaccess.thecvf.com/content/ICCV2023/html/Bai_Dynamic_PlenOctree_for_ICCV_2023_paper.html)
Supplement: Supplementary file 3 [file Bai_Dynamic_PlenOctree_for_ICCV_2023_supplemental.zip]

Archive with 5 entries (5 files):
- iccv2023_dot.mp4
- __MACOSX/._iccv2023_dot.mp4
- DOT_ICCV_2023_suppl.pdf
- __MACOSX/._DOT_ICCV_2023_suppl.pdf
- DOT_ICCV_2023_code.zip
